# Supplementary material
Source: PubMed Central journal article supplement (PMC4954777)
Supplement: NIHMS3994-supplement-1.pdf [file NIHMS3994-supplement-1.pdf]

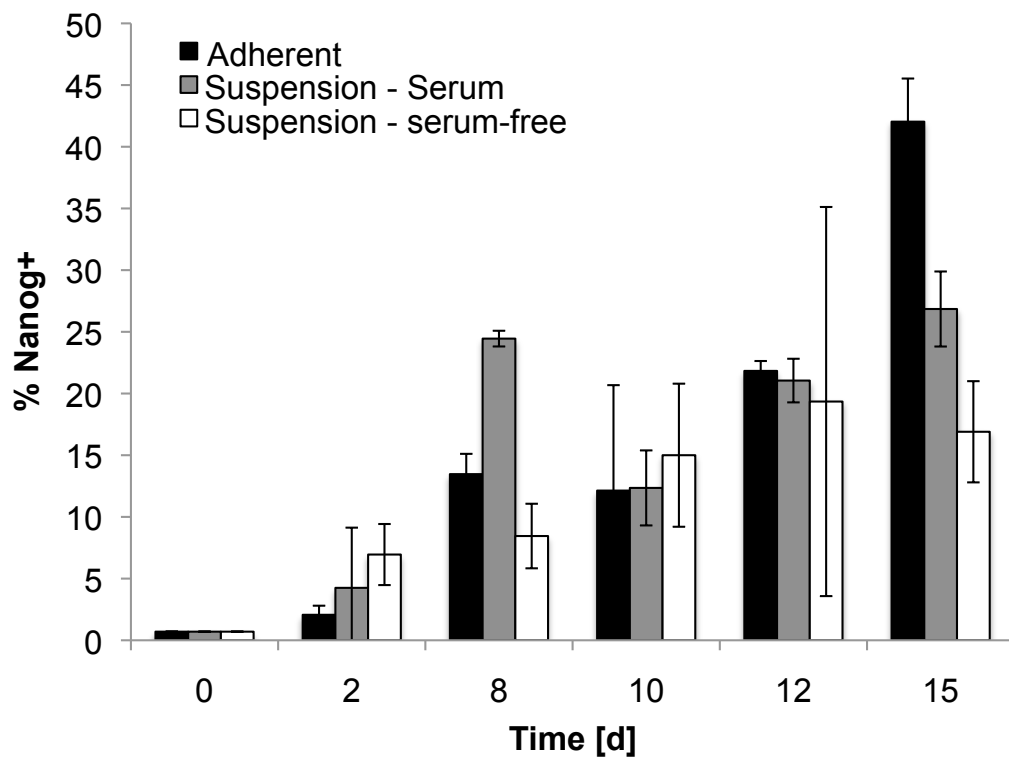

**Supplementary Figure 1. FACS analysis of NANOG expression during suspension reprogramming in the presence of dox.** NANOG expression profiles for doxycycline (Dox) induced 6C secondary fibroblast cells cultured in adherent conditions and in suspension conditions in the presence or absence of serum (data is presented as mean  $\pm$  s.d.,  $n = 2$ ).

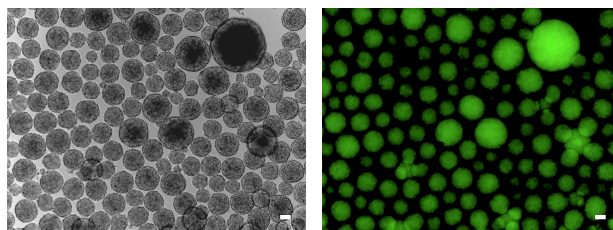

BF

EGFP

**Supplementary Figure 2. Example micrographs of suspension reprogrammed iPSC aggregate cultures after dox removal.** Withdrawal of dox from SiPSC cultures leads to formation and compaction of aggregates. SiPSC aggregates express EGFP from a *Rosa26-rtta-IRES-GFP* cassette expressed in secondary 6C cells. BF = bright field; EGFP = Enhanced Green Fluorescent Protein. Scale bars = 100 $\mu$ m

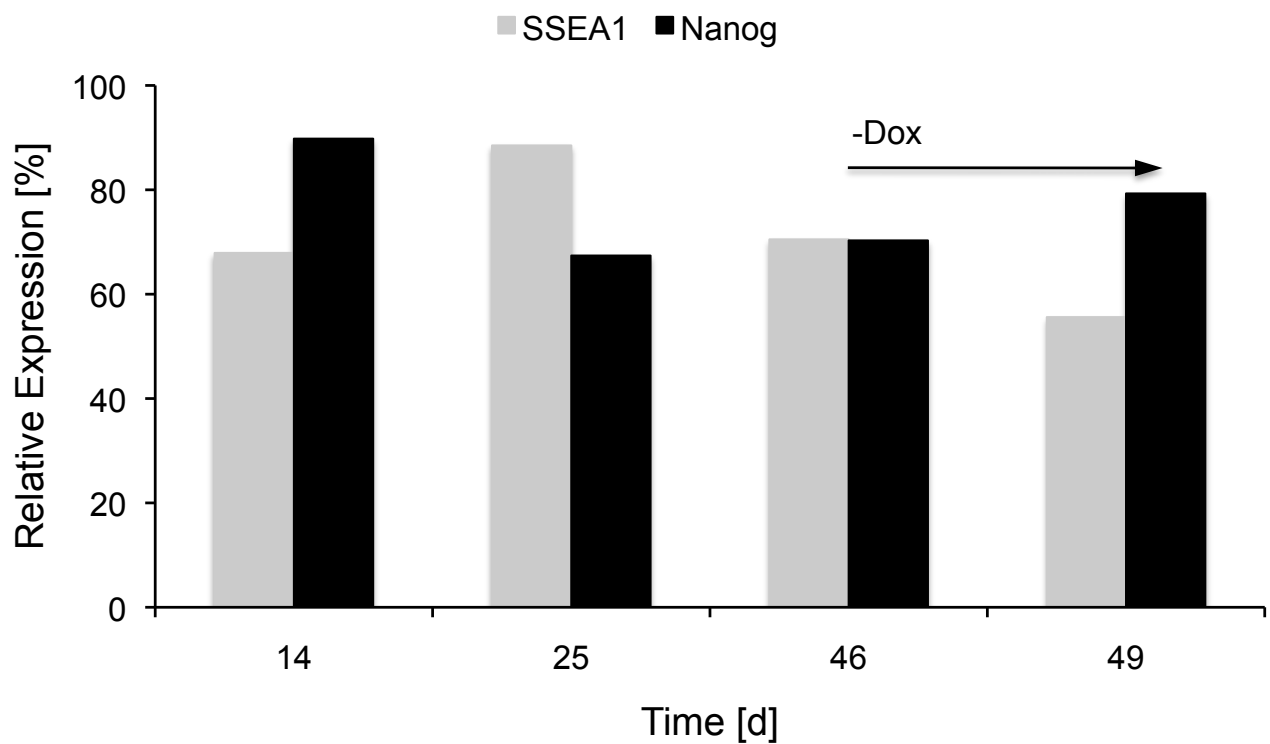

**Supplementary Figure 3. Sustained SSEA-1 and NANOG expression in suspension reprogrammed and expanded secondary inducible MEF cells.** Secondary 6C MEF cells were induced in suspension bioreactors and continuously cultured for 46 days in the presence of dox. Cells were assayed for pluripotency marker expression at indicated timepoints. At day 46 dox was removed and cells were cultured in the absence of dox for another 13 days in suspension.

### $\alpha$ -Actin

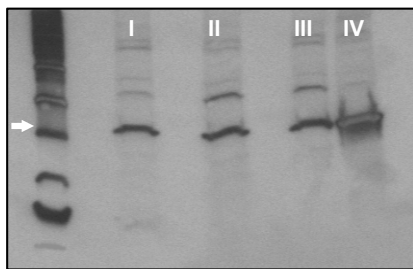

### Oct4

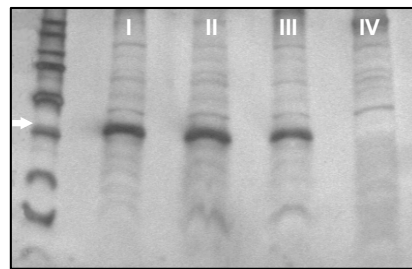

### Nanog

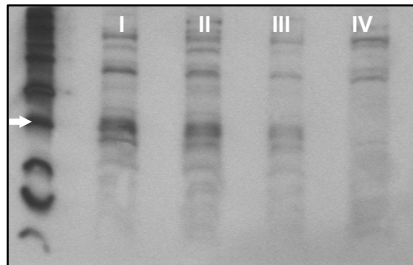

### Dppa3

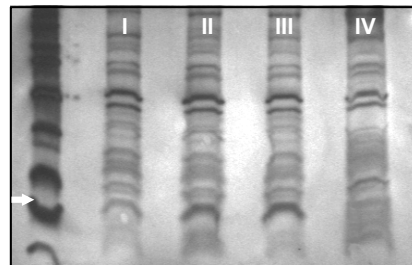

**Supplementary Figure 4.** Western blot analysis of  $\alpha$ -actin, OCT4, NANOG and DPPA3 in R1 ES control (I), suspension-derived primary B6 iPSC (II), suspension-derived secondary 6C iPSC (III) and primary fibroblasts (IV). Protein standards of 10kD, 15kD, 20kD, 25kD, 37kD, 50kD, 75kD, 100kD and 150kD were used. Arrow indicates Mr( $\alpha$ -actin) $\sim$ 42kD, Mr(OCT4) $\sim$ 40kD, Mr(NANOG) $\sim$ 40kD and Mr(DPPA3) $\sim$ 17kD, respectively.

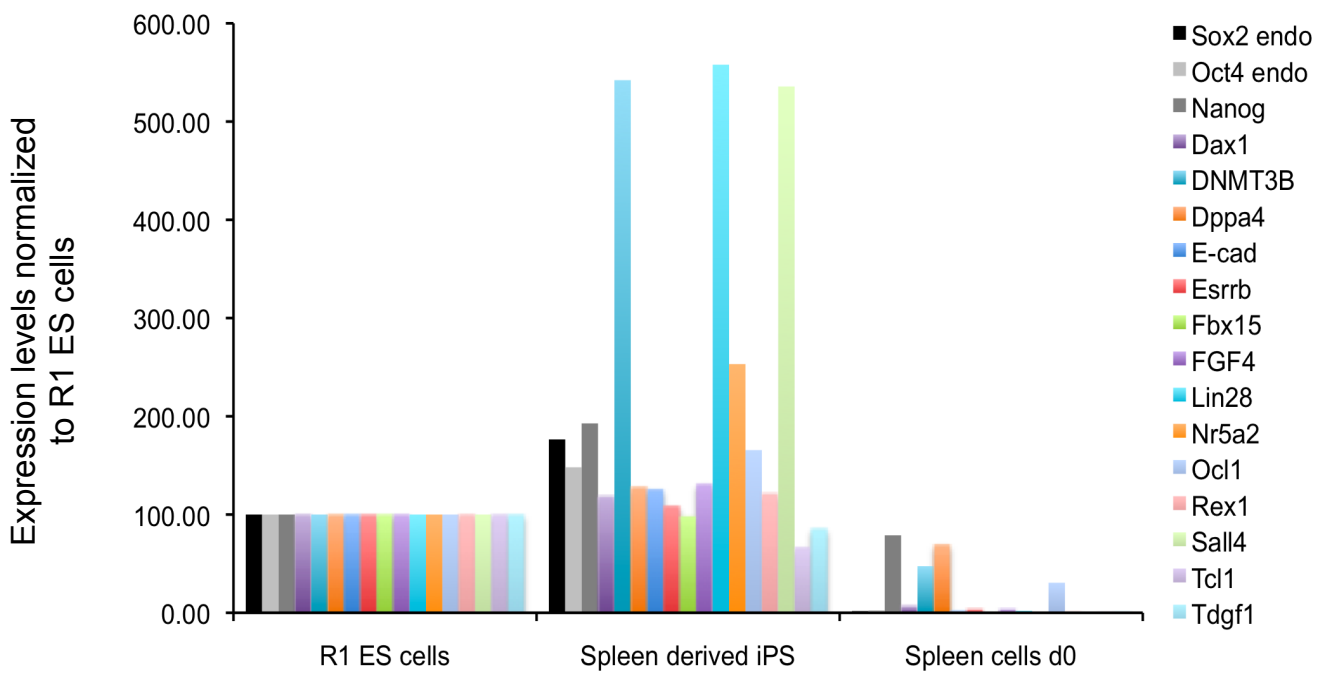

**Supplementary Figure 5. Q-PCR analysis of pluripotency factor expression in spleen derived SiPSCs and non induced parental spleen cells from the same chimera.** Quantitative PCR was performed for a panel of pluripotency associated genes. Expression levels of the factors in spleen derived suspension iPS cells and spleen cells at day 0 before dox induction were normalized to R1 ES control cells and compared.

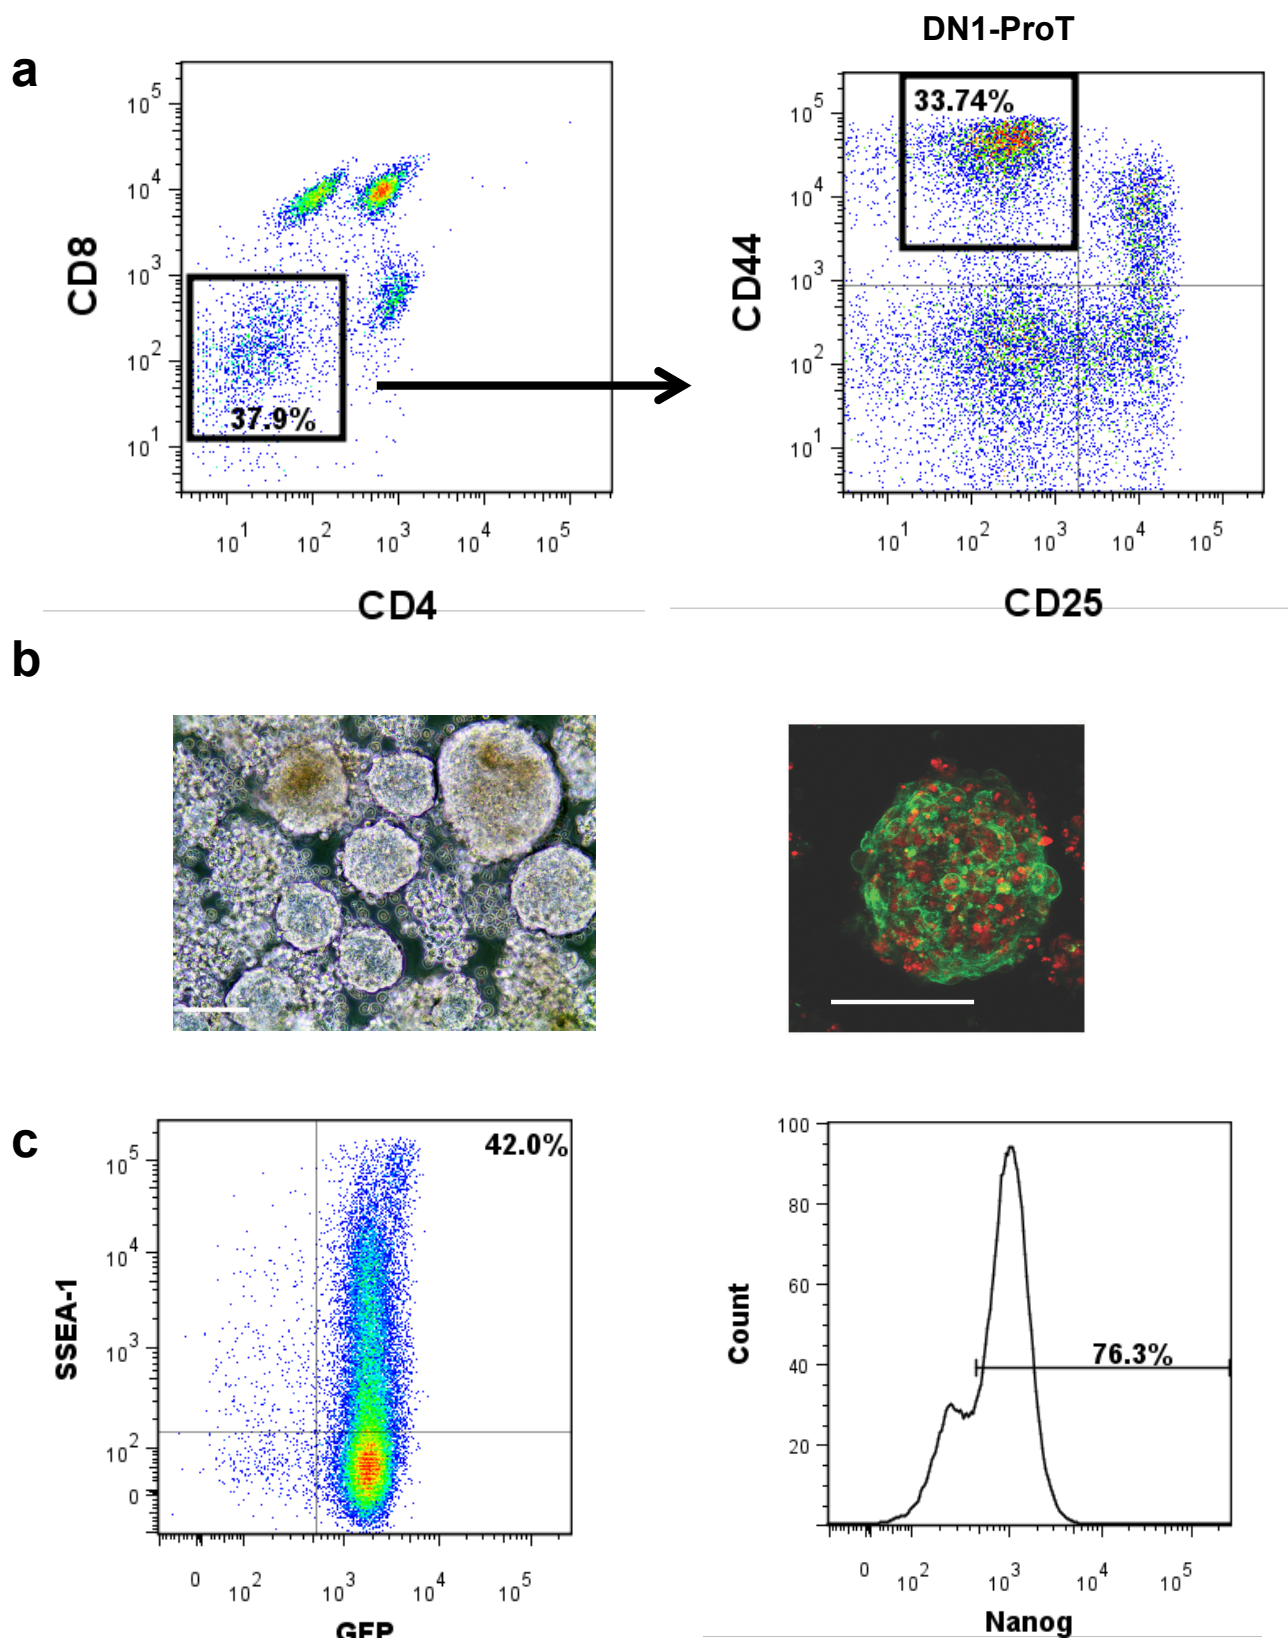

**Supplementary Figure 6. Suspension reprogrammed iPSCs from purified DN1-progenitor T cells from the thymus.** (a) Gating strategy for isolation of immature DN1 progenitor T cells from secondary chimeric mice. Cells were isolated from the thymus, stained as described in materials and methods and sorted for CD4<sup>+</sup>CD8<sup>+</sup>CD25<sup>+</sup>CD44<sup>+</sup> surface marker expression. (b) Morphology of DN1-derived SiPSCs reprogrammed with doxycycline in suspension after 16 days (left). Confocal immunofluorescence image of SSEA-1 expression (green) and nuclear counterstain (red) of DN-1-derived iPSCs (scale bar is 100  $\mu$ m). (c) SSEA-1 surface marker and intracellular NANOG expression on suspension reprogrammed DN1-iPSCs after 25 days.

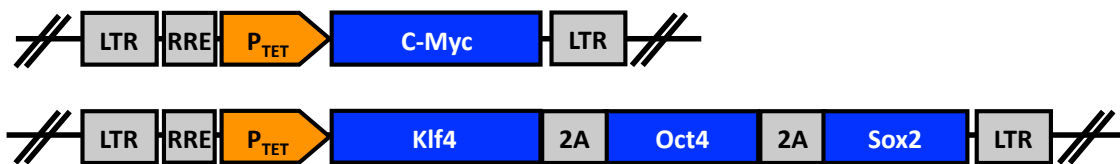

**Supplementary Figure 7. Schematic representation of vector constructs used to reprogram primary mouse fibroblasts.** IRES, internal ribosome entry site; LTR, long terminal repeat; PTET, doxycycline responsive Promoter; RRE, rev responsive element; 2A, self-cleaving peptide sequence;

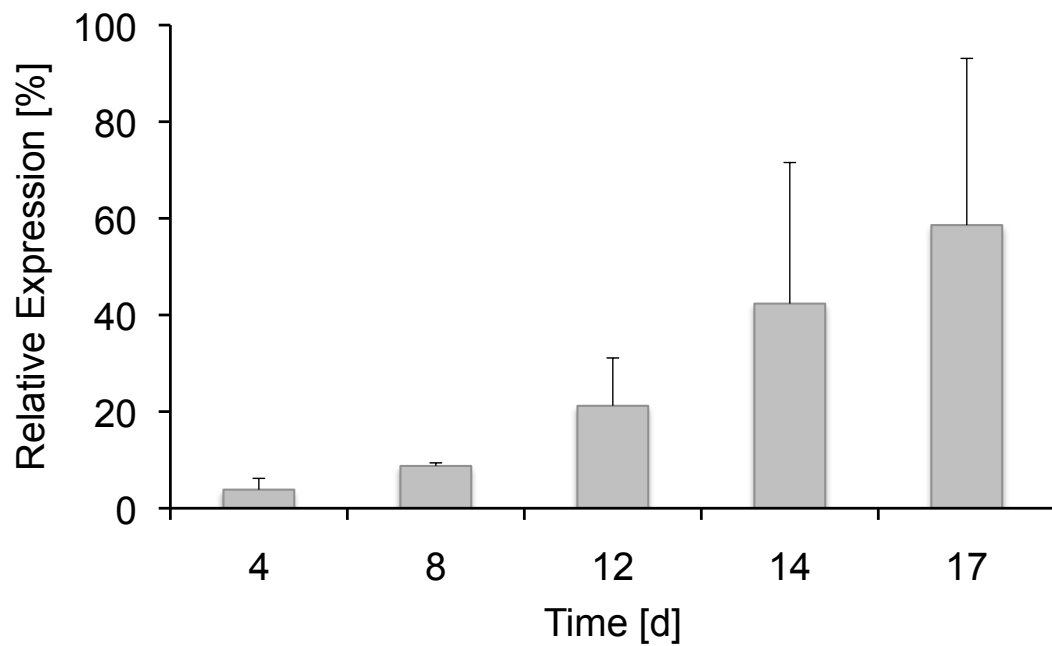

**Supplementary Figure 8. FACS analysis of SSEA-1 expression in adult tail tip derived fibroblasts reprogramming in suspension.** Tail tip fibroblast cells from adult mice were transduced with MKOS and reprogrammed in suspension for a time period of 17 days in the presence of dox. Data is presented as mean  $\pm$  s.d. ( $n = 2$ ).



| ID        | Gene Name                                                                                                                                                                                                                              |
|-----------|----------------------------------------------------------------------------------------------------------------------------------------------------------------------------------------------------------------------------------------|
| Adam19    | a disintegrin and metallopeptidase domain 19 (meltrin beta); similar to metalloprotease-disintegrin meltrin beta                                                                                                                       |
| Adamts4   | a disintegrin-like and metallopeptidase (reprolysin type) with thrombospondin type 1 motif, 4                                                                                                                                          |
| Adamts5   | similar to a disintegrin-like and metalloprotease (reprolysin type) with thrombospondin type 1 motif, 5 (aggrecanase-2); a disintegrin-like and metallopeptidase (reprolysin type) with thrombospondin type 1 motif, 5 (aggrecanase-2) |
| Ahsg      | alpha-2-HS-glycoprotein                                                                                                                                                                                                                |
| Angptl4   | angiopoietin-like 4                                                                                                                                                                                                                    |
| Aspn      | asporin                                                                                                                                                                                                                                |
| Bmp4      | bone morphogenetic protein 4                                                                                                                                                                                                           |
| Ccdc80    | coiled-coil domain containing 80                                                                                                                                                                                                       |
| Chl1      | cell adhesion molecule with homology to L1CAM                                                                                                                                                                                          |
| Col10a1   | collagen, type X, alpha 1                                                                                                                                                                                                              |
| Col12a1   | collagen, type XII, alpha 1                                                                                                                                                                                                            |
| Col18a1   | collagen, type XVIII, alpha 1                                                                                                                                                                                                          |
| Col5a2    | collagen, type V, alpha 2                                                                                                                                                                                                              |
| Col6a1    | collagen, type VI, alpha 1                                                                                                                                                                                                             |
| Col6a2    | collagen, type VI, alpha 2                                                                                                                                                                                                             |
| Col6a3    | collagen, type VI, alpha 3                                                                                                                                                                                                             |
| Col8a1    | collagen, type VIII, alpha 1                                                                                                                                                                                                           |
| Comp      | cartilage oligomeric matrix protein                                                                                                                                                                                                    |
| Ctgf      | connective tissue growth factor                                                                                                                                                                                                        |
| Dpt       | dermatopontin                                                                                                                                                                                                                          |
| Fbln1     | fibulin 1                                                                                                                                                                                                                              |
| Hapln1    | hyaluronan and proteoglycan link protein 1                                                                                                                                                                                             |
| Kazald1   | Kazal-type serine peptidase inhibitor domain 1                                                                                                                                                                                         |
| Lgals3bp  | lectin, galactoside-binding, soluble, 3 binding protein                                                                                                                                                                                |
| Lox       | lysyl oxidase                                                                                                                                                                                                                          |
| Lum       | lumican                                                                                                                                                                                                                                |
| Mamdc2    | MAM domain containing 2                                                                                                                                                                                                                |
| Matn2     | matrilin 2                                                                                                                                                                                                                             |
| Mfap2     | microfibrillar-associated protein 2                                                                                                                                                                                                    |
| Mfap5     | microfibrillar associated protein 5                                                                                                                                                                                                    |
| Mmp11     | matrix metallopeptidase 11                                                                                                                                                                                                             |
| Mmp13     | matrix metallopeptidase 13                                                                                                                                                                                                             |
| Mmp19     | matrix metallopeptidase 19                                                                                                                                                                                                             |
| Mmp2      | matrix metallopeptidase 2                                                                                                                                                                                                              |
| Mmp3      | matrix metallopeptidase 3                                                                                                                                                                                                              |
| Nid1      | similar to Nidogen precursor (Entactin); nidogen 1; similar to Nid1 protein                                                                                                                                                            |
| Olfml2a   | olfactomedin-like 2A                                                                                                                                                                                                                   |
| Podn      | podocan                                                                                                                                                                                                                                |
| Postn     | periostin, osteoblast specific factor                                                                                                                                                                                                  |
| Ptn       | pleiotrophin                                                                                                                                                                                                                           |
| Sparcl1   | SPARC-like 1                                                                                                                                                                                                                           |
| Spon2     | spondin 2, extracellular matrix protein                                                                                                                                                                                                |
| Tgfb3     | transforming growth factor, beta 3                                                                                                                                                                                                     |
| Tgfb1     | transforming growth factor, beta induced                                                                                                                                                                                               |
| Timp4     | tissue inhibitor of metalloproteinase 4                                                                                                                                                                                                |
| Tnfrsf11b | tumor necrosis factor receptor superfamily, member 11b (osteoprotegerin)                                                                                                                                                               |
| Tnxb      | tenascin XB                                                                                                                                                                                                                            |
| Wnt16     | wingless-related MMTV integration site 16                                                                                                                                                                                              |
| Wnt7a     | wingless-related MMTV integration site 7A                                                                                                                                                                                              |

**Supplementary Table 1A.** Gene list of transcripts grouped under the GO term “extracellular matrix” exhibiting > two-fold expression differences between adherent and suspension conditions at day two after induction.

| ID       | Gene Name                                                                   |
|----------|-----------------------------------------------------------------------------|
| Adam8    | a disintegrin and metallopeptidase domain 8                                 |
| Agt      | angiotensinogen (serpin peptidase inhibitor, clade A, member 8)             |
| Anxa9    | annexin A9                                                                  |
| Cadm3    | cell adhesion molecule 3                                                    |
| Cd97     | CD97 antigen                                                                |
| Cdh2     | cadherin 2; similar to N-cadherin                                           |
| Cdh3     | cadherin 3                                                                  |
| Chl1     | cell adhesion molecule with homology to L1CAM                               |
| Cldn1    | claudin 1                                                                   |
| Cldn11   | claudin 11                                                                  |
| Col12a1  | collagen, type XII, alpha 1                                                 |
| Col18a1  | collagen, type XVIII, alpha 1                                               |
| Col6a1   | collagen, type VI, alpha 1                                                  |
| Col6a2   | collagen, type VI, alpha 2                                                  |
| Col8a1   | collagen, type VIII, alpha 1                                                |
| Comp     | cartilage oligomeric matrix protein                                         |
| Cpxm1    | carboxypeptidase X 1 (M14 family)                                           |
| Ctgf     | connective tissue growth factor                                             |
| Ctnnd2   | catenin (cadherin associated protein), delta 2                              |
| Cx3cl1   | chemokine (C-X3-C motif) ligand 1                                           |
| Cyr61    | cysteine rich protein 61                                                    |
| Dcbl2    | discoidin, CUB and LCCL domain containing 2                                 |
| Dpt      | dermatopontin                                                               |
| Dsg1b    | desmoglein 1 beta                                                           |
| Dsg3     | desmoglein 3                                                                |
| Dsg4     | desmoglein 4                                                                |
| Edil3    | EGF-like repeats and discoidin I-like domains 3                             |
| Fblim1   | filamin binding LIM protein 1                                               |
| Fndc3a   | fibronectin type III domain containing 3A                                   |
| Gpnmb    | glycoprotein (transmembrane) nmb                                            |
| Hapln1   | hyaluronan and proteoglycan link protein 1                                  |
| Itga10   | integrin, alpha 10                                                          |
| Itga11   | integrin alpha 11                                                           |
| Itgb3    | integrin beta 3                                                             |
| Itgb8    | integrin beta 8                                                             |
| Jub      | ajuba                                                                       |
| Lgals3bp | lectin, galactoside-binding, soluble, 3 binding protein                     |
| Lpp      | LIM domain containing preferred translocation partner in lipoma             |
| Lypd3    | Ly6/Plaur domain containing 3                                               |
| Mcam     | melanoma cell adhesion molecule                                             |
| Megf10   | multiple EGF-like-domains 10                                                |
| Mpzi2    | myelin protein zero-like 2                                                  |
| Msln     | mesothelin                                                                  |
| Nell2    | NEL-like 2 (chicken)                                                        |
| Nid1     | similar to Nidogen precursor (Entactin); nidogen 1; similar to Nid1 protein |
| Pcdh1    | protocadherin 1                                                             |
| Pcdhb16  | protocadherin beta 16                                                       |
| Pcdhb17  | protocadherin beta 17                                                       |
| Pcdhb18  | protocadherin beta 18                                                       |
| Pcdhb19  | protocadherin beta 19                                                       |
| Postn    | periostin, osteoblast specific factor                                       |
| Pvr      | poliovirus receptor                                                         |
| Sdk2     | sidekick homolog 2 (chicken)                                                |
| Sned1    | sushi, nidogen and EGF-like domains 1                                       |
| Sox9     | SRY-box containing gene 9                                                   |
| Spon2    | spondin 2, extracellular matrix protein                                     |
| Spp1     | secreted phosphoprotein 1                                                   |
| Svep1    | sushi, von Willebrand factor type A, EGF and pentraxin domain containing 1  |
| Tgfb1    | transforming growth factor, beta induced                                    |

**Supplementary Table 1B.** Gene list of transcripts grouped under the GO term “cell adhesion” exhibiting > two-fold expression differences between adherent and suspension conditions at day two after induction.

| Name                  | Forward                                                                                       | Reverse                                                                         |
|-----------------------|-----------------------------------------------------------------------------------------------|---------------------------------------------------------------------------------|
| <b>Q-PCR primer</b>   |                                                                                               |                                                                                 |
| B-actin               | GAAATCGTGCGTGACATCAAAG                                                                        | TGTAGTTTCATGGATGCCACAG                                                          |
| Gapdh                 | AGGTCGGTGTGAACGGATTTG                                                                         | TGTAGACCATGTAGTTGAGGTCA                                                         |
| Hprt1                 | CACAGGACTAGAACACCTGC                                                                          | GCTGGTGAAAAGGACCTCT                                                             |
| C-myc (TOTAL)         | TCCACCGCCGATCAGCTGGA                                                                          | TGGCAGCGGCTGAGAAACCG                                                            |
| Cdh1 (1)              | TCTACCAAAGTGACGCTGAAGTCC                                                                      | GGTACACGCTGGGAAACATGAG                                                          |
| Cdh1 (2)              | CAGGTCTCCTCATGGCTTTGC                                                                         | CTTCCGAAAAGAAGGCTGTCC                                                           |
| Cdh2                  | AGCGCAGTCTTACCGAAGG                                                                           | TCGCTGCTTTCATACTGAACTTT                                                         |
| Cripto (Tdgf1)        | CAGTGCCTTTGAATTTGGACCCGT                                                                      | AGTCCCTCCATTCAGACAGCAAGT                                                        |
| Dax1                  | CCTGCACCTCGAGATGATGGA                                                                         | GCCTGGTGGTAAGCATTTC                                                             |
| DNMT3B                | AGCGGGTATGAGGAGTGAT                                                                           | CTGCGTGTAATTCAGAAGGCT                                                           |
| Dppa4                 | AGCATCTTGGGCCAGAATTGCATC                                                                      | TTCTTATCGGGTACCCAGGCTTGT                                                        |
| Esrrb                 | AACCGAATGTCGTCCGAAGAC                                                                         | GTGGCTGAGGGCATCAATG                                                             |
| Fbx15                 | TCGTGGGACTGAGCACAACCTA                                                                        | TGACAGATGAGCCTCTAACAAAC                                                         |
| Fgf4                  | GTGTGCCTTTCTTACCGACG                                                                          | CTGAGGGCCATGAACATACCG                                                           |
| Klf2                  | CTCAGCGAGCCTATCTTGCC                                                                          | CACGTTGTTTAGGTCTCATCC                                                           |
| Lin28                 | TGTTCTGTATTGGGAGTGAGC                                                                         | GCTTGCATTCCTTGGCATG                                                             |
| Nanog (1)             | AACCAAAGGATGAAGTGCAAGCGG                                                                      | TCCAAGTTGGGTTGGTCCAAGTCT                                                        |
| Nanog (2)             | TTGCTTACAAGGGTCTGCTACT                                                                        | CCACAAACAGATCCGGCTT                                                             |
| Nr5a2                 | GTGGCGATAAAGTGCTGGGT                                                                          | GCGTTTTGTCAATTTGGCAATTC                                                         |
| Ocln                  | CCTCCAATGGCAAAGTGAATGGCA                                                                      | TGTTTCATAGTGGTCAGGGTCCGT                                                        |
| PeCam1                | GCTGGCAACAAGTTGCTCTCTGAA                                                                      | CGTTGCACTGCTTGGCTTTGAAGA                                                        |
| Pou5f1 (endo)         | CCATGCATTCAAACTGAGGCACCA                                                                      | AGCTATCTACTGTGTGTCCCAGTC                                                        |
| Rex1                  | CCCTCGACAGACTGACCCTAA                                                                         | TCGGGGCTAATCTCACTTTTCAT                                                         |
| SALL4                 | TGGTCCAGCCAATGACTCTTCTT                                                                       | TCGGATAAATGTTGGAGGGAGGCT                                                        |
| Sox2 endo             | ACTAGGGCTGGGAGAAAGAAGAGG                                                                      | TTAAGCCTCGGGCTCCAAACTTC                                                         |
| Tcl1                  | TGGGAGAAGCACGTGTACTTTGGAT                                                                     | GTTGCCACATTAAGGCAGCTCGT                                                         |
| Thy1                  | TTACCCTAGCCAACCTCACCACCA                                                                      | AAATGAAGTCCAGGGCTTGGAGGA                                                        |
| Zfp42 (1)             | CCCTCGACAGACTGACCCTAA                                                                         | TCGGGGCTAATCTCACTTTTCAT                                                         |
| Zfp42 (2)             | GAAAGTGAGATTAGCCCCGAG                                                                         | GTCCCCCTTTGTCATGTACTCC                                                          |
| <b>Cloning Primer</b> |                                                                                               |                                                                                 |
| cMyc                  | ACCCTGAACTTCGACCTGCTGAAGCTGGCCG<br>GCGACGTGGAGAGCAACCCCGGCCCTGCTAG<br>CATGCCCTCAACGTGAACTTC   | AGTCGATATCAGATCTTTATGCACCAGAGTTTCGAA                                            |
| eGFP                  | GGAATTCACCATGGGTAGCAACAAGAGCAAG<br>CCCAAGGATGCCAGCCAGCGGCGGAGGCC<br>GCTAGCATGGTGAGCAAGGGCGAG  | CGGGGTACCGTTTAAACTCTAGATCTTACTTGTACAG<br>CTCGTCCA                               |
| IRES                  | GCGAATTCACGCGTAGTCGATAAGCTAATCCG<br>CC                                                        | GCTCTAGAGCTAGCGTTGTGGCCATATTATCATCGT                                            |
| Klf4                  | ACCCTGAACTTCGACCTGCTGAAGCTGGCCG<br>GCGACGTGGAGAGCAACCCCGGCCCTGCTAG<br>CATGGCTGTCAGCGACGCTCTGC |                                                                                 |
| PCAG                  | CCATCGATACGCGTCTCGAGTCGACATTGATTA<br>TTGACTAGT                                                |                                                                                 |
| Ptet<br>rTTA          | GTTGGCGCGCCTGCTCTCGTTAATTAACCTCG                                                              | CGATGCGCTAGCTTGTGATGGCCGCCACCGC<br>GCTCTAGAGCTAGCACGCGTTACCCGGGAGCATGT<br>CAAGG |
| Sox2                  | ACCCTGAACTTCGACCTGCTGAAGCTGGCCG<br>GCGACGTGGAGAGCAACCC                                        | CGGCCCTGCTAGCATGTACAACATGATGGAGAC                                               |

**Supplementary Table 2. Sequences of oligonucleotides used in this study.**

| Name                 | Company        | Catalogue number |
|----------------------|----------------|------------------|
| Actin                | BD Biosciences | BD 612656        |
| Actn1                | Sigma          | A7811            |
| AnnexinV Alexa 647   | Invitrogen     | A23204           |
| Tubb3                | Sigma          | T8660            |
| cTnT                 | Thermo         | MS-295-P1        |
| CD4                  | BD Biosciences | 552051           |
| CD8a                 | BD Biosciences | 553035           |
| CD25                 | BD Biosciences | 552880           |
| CD44                 | BD Biosciences | 553134           |
| Flk-1-APC            | BD Biosciences | 560070           |
| Foxa2                | Abcam          | ab40874          |
| GFP                  | Invitrogen     | G10362           |
| Klf4                 | R&D            | AF3158           |
| Nanog                | eBiosciences   | 14-5761-80       |
| Nanog (western blot) | Milipore       | AB5731           |
| Oct3/4               | BD Biosciences | 611203           |
| Pdgfr $\alpha$       | eBiosciences   | 13-1401-82       |
| Sox2                 | R&D            | MAB2018          |
| SSEA-1               | eBiosciences   | 14-8813-82       |
| Dppa3                | Santa-Cruz     | Sc-67249         |
| Tbx3                 | Santa-Cruz     | Sc-17871         |

**Supplementary Table 3. Antibodies used in this study.**
